# Supplementary material for: Curative in vivo hematopoietic stem cell gene therapy of murine thalassemia using large regulatory elements
Source: PubMed Central journal article supplement (PMC7455141; doi:10.1172/jci.insight.139538), 2020-08-20
Supplement: jciinsight-5-139538-s059.pdf [file jciinsight-5-139538-s059.pdf]

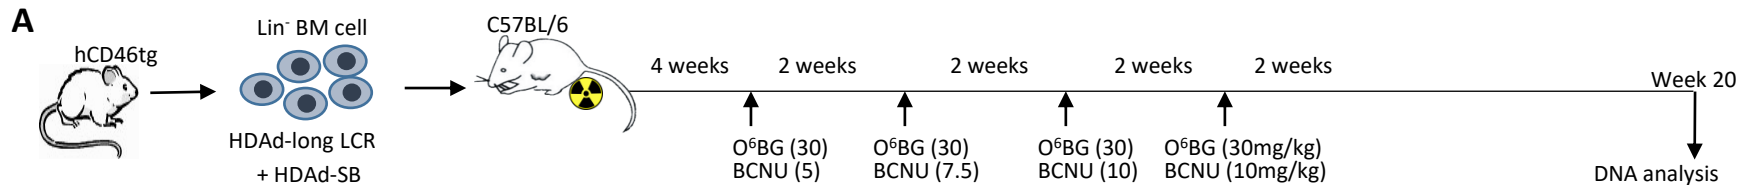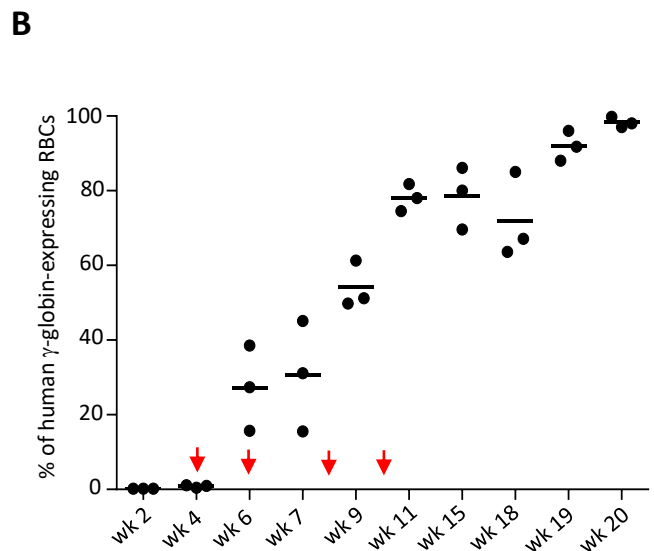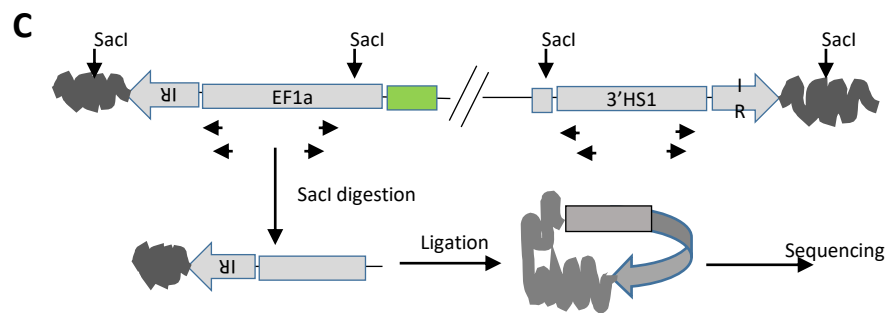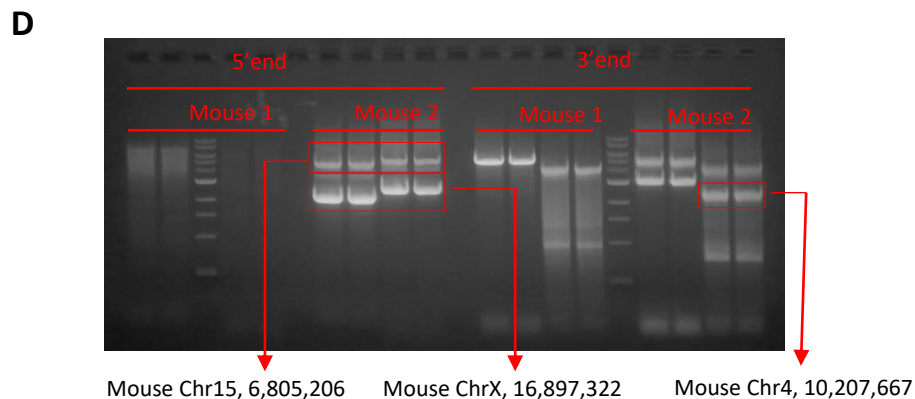

**E**

CAGTCAACTT AGTGTATGTA AACTTCTGAC CCACTGGAAT TGTGATACAG TGAATTATAA GTGAAATAAT CTGTCTGTAA 5' end vector sequence  
 ACAATTGTTG GAAAAATGAC TTGTGTCATG CACAAAGTAG ATGTCCTAAC TGACTTGCCA AAACATATTGT TTGTTAACAA Sleeping beauty IR/DR sequence  
 GAAATTTGTG GAGTAGTTGA AAAACGAGTT TTAATGACTC CAACTTAAGT GTATGTAAAC TTCCGACTTC AACTGTAAGA Integration junction (chr15, 6805206)  
 ATGGCCCATT CATCTATAGT AGCACACAAT ATTTGCATTT GTGCGACAGT ATAAGGGACA ATTATGCTAT CAGGCATTTT  
 TCCAAAGTGA GTAATCGAAG TTTTATATACC TTTGTGTGCC ATGTTTGCTA

CAGTCAACT TAGTGTATGT AACTTCTGA CCCACTGGAA TTGTGATACA GTGAATTATA AGTGAATAA TCTGTCTGTA 5' end vector sequence  
 AACAAATGTT GGAAAAATGA CTTGTGTCAT GCACAAAGTA GATGTCCTAA CTGACTTGCC AAAACTATTG TTTGTTAACAA Sleeping beauty IR/DR sequence  
 AGAAATTTGT GGAGTAGTTG AAAAACGAGT TTTAATGACT CCAACTTAAG TGTATGTAAA CTTCCGACTT CAACGTACA Integration junction (chrX, 16897322)  
 AGTAGACCAA ATATCCATAT ACATAAAAAGA AAAAAATAGA AAAAAATTTCT AGTGACAGAA AAATGACAAA GAACATACTG  
 CTTTATTACT ACTATTAAGA TGTTTGCTTC CATTACACTC ATATGAGTCA

CAACTTGAGTG TATGTTAACT TCTGACCCAC TGGGAATGTG ATGAAAGAAA TAAAAGCTGA AATGAATCAT TCTCTCTACT 3' end vector sequence  
 ATTATTTCTGA TATTTACAT TCTTAAAATA AAGTGGTGAT CCTAACTGAC CTTAAGACAG GGAATCTTTA CTCGGATTAA Sleeping beauty IR/DR sequence  
 ATGTCAGGAA TTGTGAAAAA GTGAGTTTAA ATGTAATTTGG CTAAGGTGTA TGTAACCTC CGACTTCAAC TGTAATATCCT Integration junction (chr4, 10207667)  
 CCCCCTTGCA CCCTCTTGAT GATGCTGAGA TGAACACAGA TGCTCACTCC TTGAGGGCTC TAAGCTTATG CTGACACAGA  
 CACAGGTGCT CACTTCTATG AATGGCCTAA GATTTGAGGA CATCATGAGG

**Figure S1. SB100x-mediated integration of the 32.4kb transposon after ex vivo HSPC transduction study with HDAd-long-LCR. A)** Experimental regimen: Bone marrow Lin<sup>-</sup> cells from CD46-transgenic mice were transduced with HDAd-long-LCR and HDAd-SB at a total MOI of 500vp/cell. After one day in culture, 1x10<sup>6</sup> transduced cells/mouse were transplanted into lethally irradiated C57Bl/6 mice. At week 4, O<sup>6</sup>BG/BCNU treatment was started and repeated four times every two weeks. With each cycle, the BCNU concentration was increased from 5mg/kg, to 7.5mg/kg, to 10mg/kg (twice). At week 20, mice were sacrificed. **B)** Percentage of human  $\gamma$ -globin-positive peripheral red blood cells (RBC) measured by flow cytometry. Each symbol is an individual animal. **C)** Schematic of iPCR analysis: Five micrograms of genomic DNAs were digested with SacI, religated, and subjected to nested, inverse PCR with the indicated primers (see Materials and Methods). **D)** Agarose gel electrophoresis of cloned plasmids containing integration junctions. Indicated bands were excised and sequenced. The chromosomal localization of integration sites are shown below the gel. **E)** Examples for junction sequences. The vector body and IR/DR sequences are in blue and red, respectively. The chromosomal sequence is in green. The TA dinucleotides used by SB100x at the junction of the IR and chromosomal DNA are underlined.

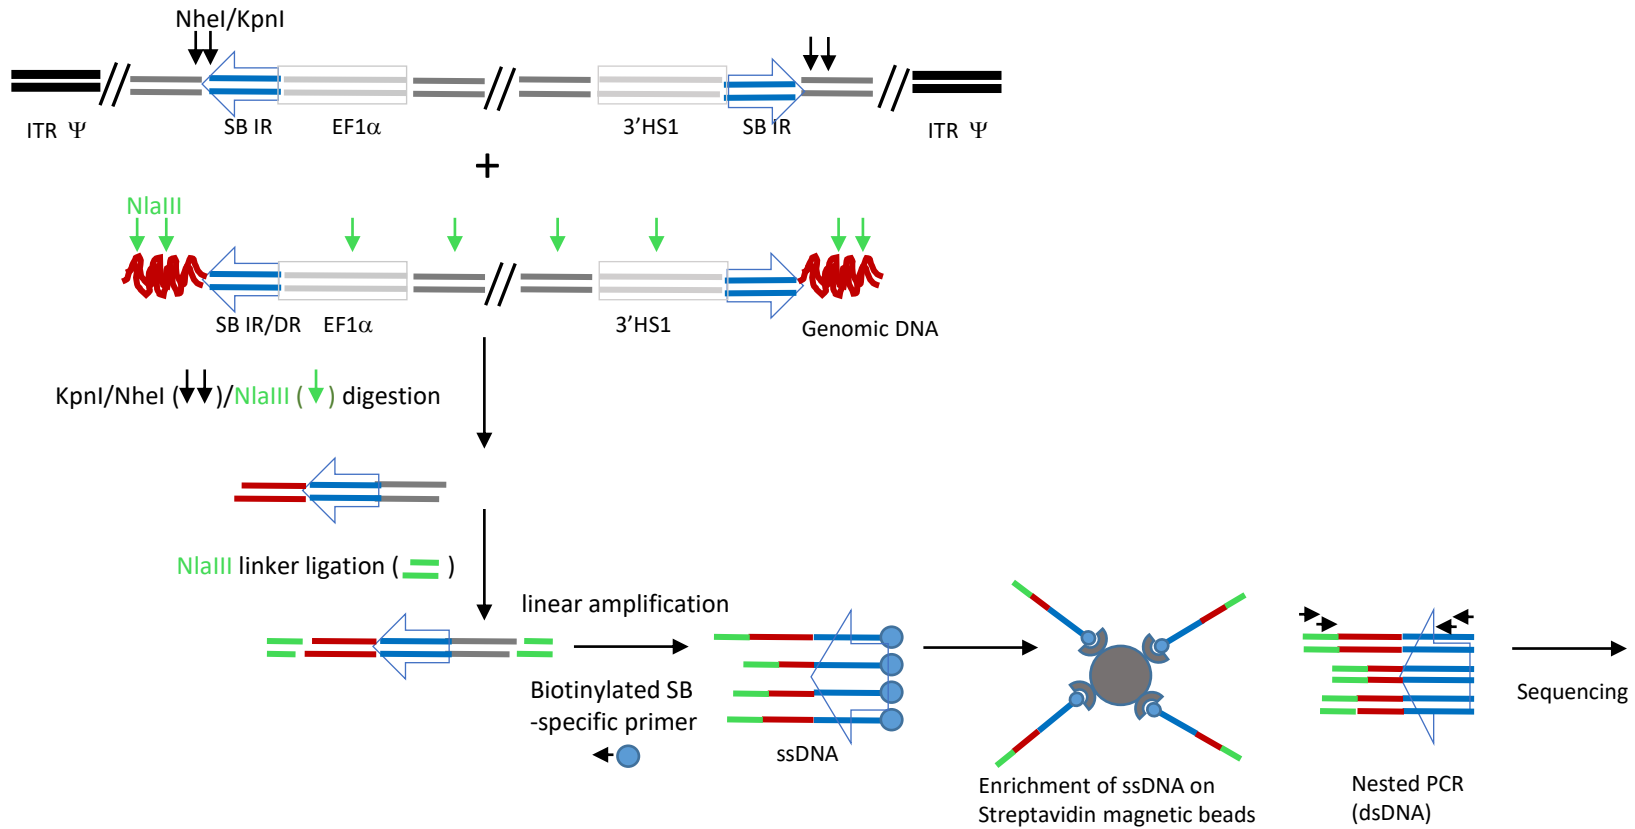

**Figure S2: Schematic of insertion site analysis.** The localization of NheI and KpnI sites in the HDAd-long-LCR vector in relation to the *Sleeping Beauty* inverted repeats (IRs) is indicated. These enzymes cut close, but outside of the SB IR/DR and are used to decrease the background of unintegrated vectors. Genomic DNA from bone marrow Lin<sup>-</sup> cells was digested with NheI and KpnI, and after heat inactivation, further digested with NlaIII. NlaIII is a 4-cutter and will create small DNA fragments. Digested DNA was then ligated with double stranded oligos with known sequence and compatible ends to the digested NlaIII fragments. Following heat-inactivation and clean-up, the linker-ligated products were used for linear amplification, which creates a single-stranded (ss) DNA population primed from the SB left arm. The primer is biotinylated, so the ssDNAs can be collected with streptavidin beads. After extensive washing, ssDNA was eluted from the beads and subjected to further amplification by two rounds of nested PCR. PCR amplicons were gel purified, cloned, sequenced and mapped to the mouse genome sequences to mark the integration sites.

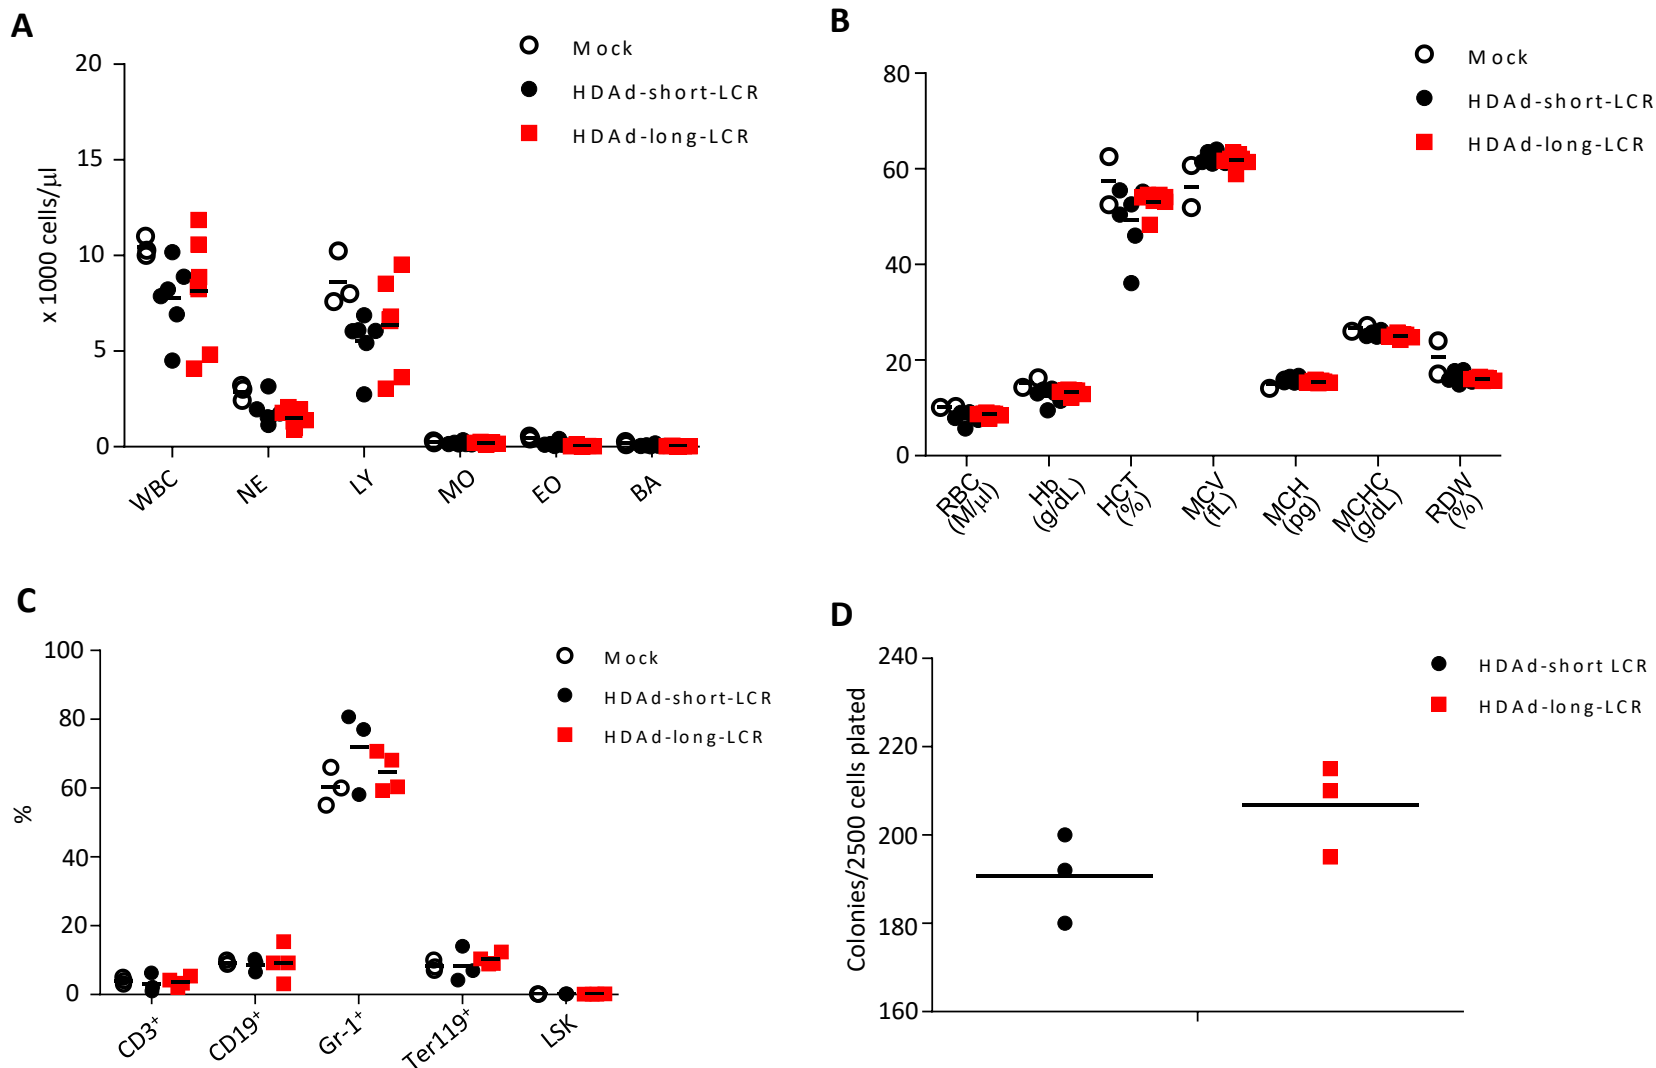

**Figures S3. Hematological parameters in secondary recipients at week 16 after transplantation. A)** White blood cells. **B)** Erythropoietic parameters. RBC: red blood cells, Hb: hemoglobin, MCV: mean corpuscular volume, MCH: mean corpuscular hemoglobin, MCHC: mean corpuscular hemoglobin concentration, RDW: red cell distribution width. **C)** Cellular bone marrow composition. **D)** Colony-forming potential of bone marrow Lin<sup>-</sup> cells. The differences between the groups were not significant in A-D. Statistical analyses were performed using two-way ANOVA.

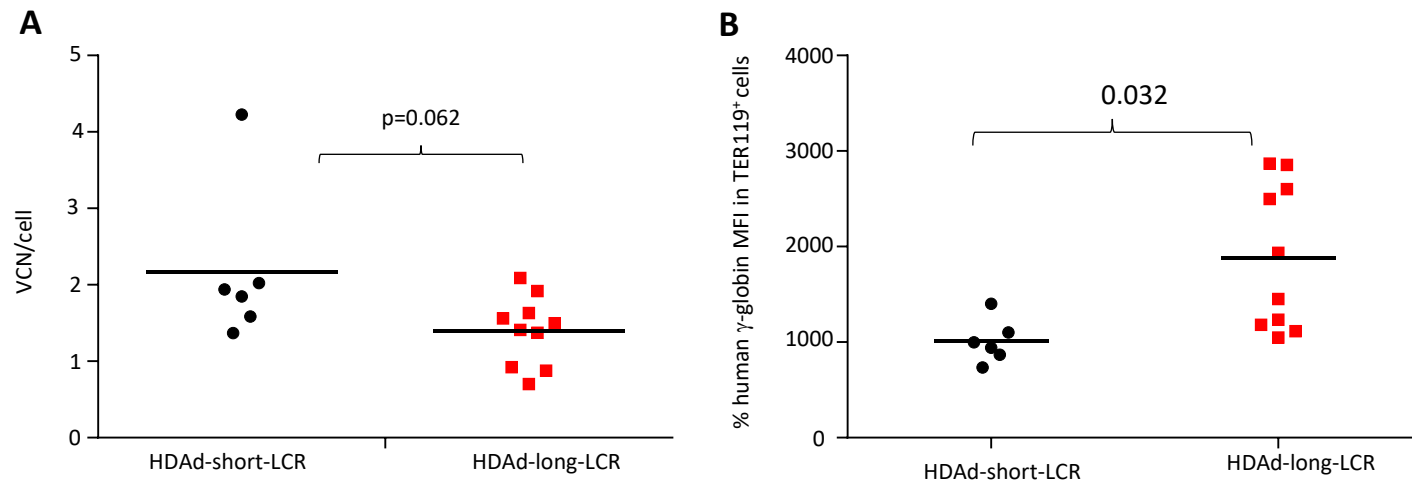

**Figure S4. Analysis of bone marrow at sacrifice.** Bone marrow was harvested at week 16 after *in vivo* HSPC transduction of Hbb<sup>th3</sup>/CD46<sup>+/+</sup> mice. **A)** Vector copy number per cell in bone marrow MNCs. The difference between the two groups is not significant. **B)** Mean Fluorescence Intensity (MFI) of  $\gamma$ -globin in erythroid (Ter119<sup>+</sup>) cells. Statistical analyses were performed using two-way ANOVA.

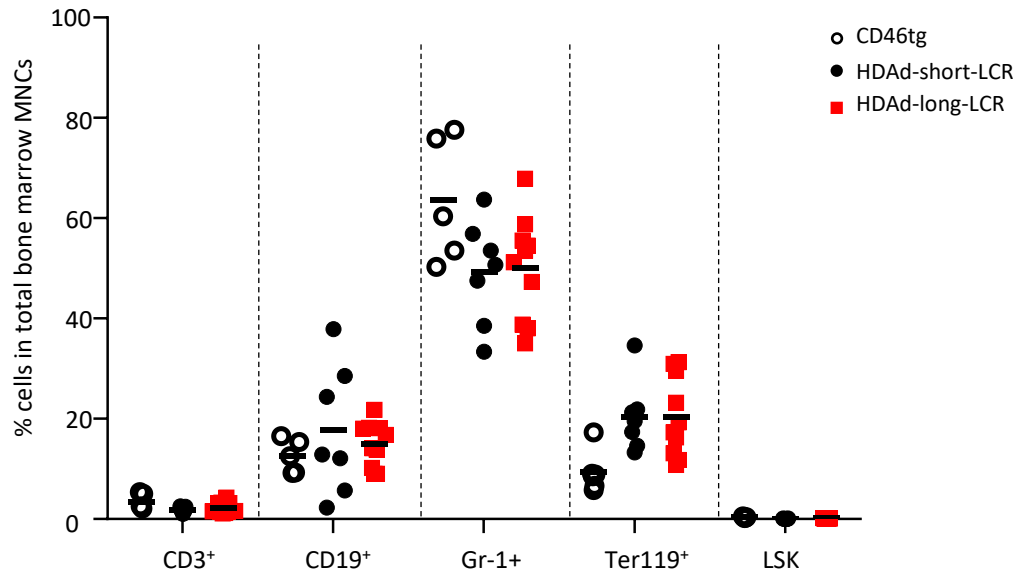

**Figure S5. Cellular bone marrow composition of CD46 and treated  $Hbb^{th3}/CD46$  mice at week 16 after *in vivo* transduction.** The differences between the groups were not significant. Statistical analyses were performed using two-way ANOVA.

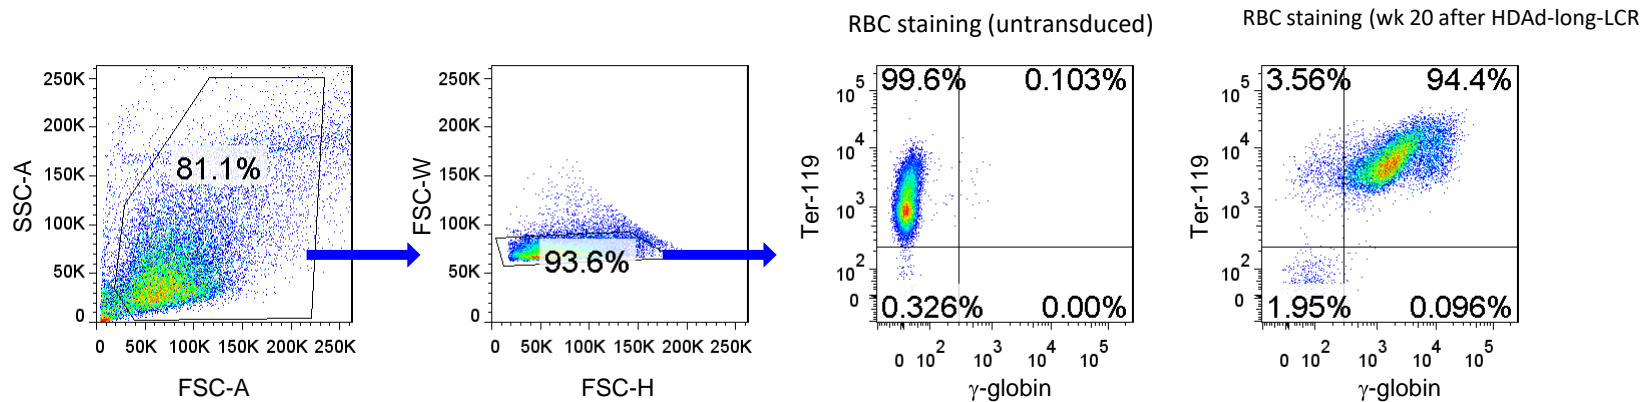

**Figure S6. Human  $\gamma$ -globin gating strategy.** Fixed and permeabilized RBCs from CD46/Hbb<sup>th3</sup> mice were stained for the erythroid marker Ter-119 and intracellular  $\gamma$ -globin.

| Name      | Description                                                  | Fold Chang |
|-----------|--------------------------------------------------------------|------------|
| HIST1H2BC | histone cluster 1, H2bd                                      | -4.16894   |
| HIST1H2BL | histone cluster 1, H2bl                                      | -4.11243   |
| HIST1H1D  | histone cluster 1, H1d                                       | -4.09723   |
| HIST1H2AJ | histone cluster 1, H2aj                                      | -4.08546   |
| HIST1H4F  | histone cluster 1, H4f                                       | -3.95791   |
| HIST1H3J  | histone cluster 1, H3j                                       | -3.9001    |
| HIST1H2BN | histone cluster 1, H2bm                                      | -3.85489   |
| HIST1H1B  | histone cluster 1, H1b                                       | -3.8492    |
| HIST1H2BK | histone cluster 1, H2bk                                      | -3.83586   |
| HIST1H3D  | histone cluster 1, H3d                                       | -3.82914   |
| HIST1H4A  | histone cluster 1, H4a                                       | -3.80989   |
| HIST1H2BC | histone cluster 1, H2bc                                      | -3.79098   |
| HIST1H4I  | histone cluster 1, H4i                                       | -3.74475   |
| HIST1H2BJ | histone cluster 1, H2bj                                      | -3.74226   |
| HIST1H4C  | histone cluster 1, H4c                                       | -3.72763   |
| HIST1H2BH | histone cluster 1, H2bh                                      | -3.72637   |
| HIST1H3B  | histone cluster 1, H3b                                       | -3.72064   |
| HIST1H4E  | histone cluster 1, H4e                                       | -3.71633   |
| HIST2H2AB | histone cluster 2, H2ab                                      | -3.64594   |
| HIST1H2BB | histone cluster 1, H2bb                                      | -3.61441   |
| HIST1H2BF | histone cluster 1, H2bf                                      | -3.60268   |
| HIST1H4H  | histone cluster 1, H4h                                       | -3.58982   |
| HIST1H2AE | histone cluster 1, H2ae                                      | -3.57346   |
| HIST1H2BI | histone cluster 1, H2bi                                      | -3.57232   |
| FAM132B   | family with sequence similarity 132, member B                | -3.50956   |
| HIST1H4D  | histone cluster 1, H4d                                       | -3.49129   |
| HIST1H3H  | histone cluster 1, H3h                                       | -3.48005   |
| HIST1H1C  | histone cluster 1, H1c                                       | -3.45638   |
| HIST1H2BC | histone cluster 1, H2bo                                      | -3.45056   |
| DUSP5     | dual specificity phosphatase 5                               | -3.44396   |
| HIST3H2BB | histone cluster 3, H2bb                                      | -3.40433   |
| HIST1H2AL | histone cluster 1, H2al                                      | -3.36177   |
| HIST2H2BF | histone cluster 2, H2bf                                      | -3.36165   |
| IFIT1B    | interferon-induced protein with tetratricopeptide repeats 1B | -3.34631   |
| HIST1H4L  | histone cluster 1, H4l                                       | -3.32914   |
| MIR3687-1 | microRNA 3687-1                                              | -3.32186   |
| PSAT1     | phosphoserine aminotransferase 1                             | -3.30346   |
| HIST1H2AB | histone cluster 1, H2ab                                      | -3.29777   |
| HIST1H2AK | histone cluster 1, H2ak                                      | -3.25212   |
| HIST1H2AI | histone cluster 1, H2ai                                      | -3.19867   |
| HIST1H2BN | histone cluster 1, H2bn                                      | -3.19558   |
| CRHBP     | corticotropin releasing hormone binding protein              | -3.19481   |
| OSM       | oncostatin M                                                 | -3.18292   |
| HIST1H3I  | histone cluster 1, H3i                                       | -3.15126   |
| HIST1H3F  | histone cluster 1, H3f                                       | -3.13395   |
| CISH      | cytokine inducible SH2-containing protein                    | -3.11057   |



|           |                                                               |          |
|-----------|---------------------------------------------------------------|----------|
| HIST1H2AF | histone cluster 1, H2ah                                       | -3.09537 |
| HIST1H2BG | histone cluster 1, H2bg                                       | -3.05428 |
| HIST1H3C  | histone cluster 1, H3c                                        | -3.00309 |
| SOCS2     | suppressor of cytokine signaling 2                            | -2.98632 |
| CREB3L1   | cAMP responsive element binding protein 3-like 1              | -2.96358 |
| HIST1H2AC | histone cluster 1, H2ag                                       | -2.96245 |
| TRIB3     | tribbles pseudokinase 3                                       | -2.94498 |
| HIST2H2BE | histone cluster 2, H2be                                       | -2.92837 |
| HIST1H2AN | histone cluster 1, H2am                                       | -2.91216 |
| HIST1H2AC | histone cluster 1, H2ac                                       | -2.91095 |
| MIR3648-1 | microRNA 3648-1                                               | -2.90462 |
| CCDC71L   | coiled-coil domain containing 71-like                         | -2.89333 |
| EHF       | ets homologous factor                                         | -2.88862 |
| HIST1H4B  | histone cluster 1, H4b                                        | -2.88564 |
| SIAH2     | siah E3 ubiquitin protein ligase 2                            | -2.88172 |
| FN1       | fibronectin 1                                                 | -2.85148 |
| HIST2H3D  | histone cluster 2, H3d                                        | -2.79615 |
| ASNS      | asparagine synthetase (glutamine-hydrolyzing)                 | -2.79514 |
| LRR8A     | leucine rich repeat containing 8 family, member A             | -2.78705 |
| HIST1H3G  | histone cluster 1, H3g                                        | -2.74349 |
| HES6      | hes family bHLH transcription factor 6                        | -2.64125 |
| HIST2H2AC | histone cluster 2, H2ac                                       | -2.63357 |
| TMCC2     | transmembrane and coiled-coil domain family 2                 | -2.60575 |
| SH3BGL3   | SH3 domain binding glutamate-rich protein like 3              | -2.54527 |
| PIM1      | Pim-1 proto-oncogene, serine/threonine kinase                 | -2.43758 |
| HBB       | hemoglobin, beta                                              | -2.42757 |
| MTRNR2L2  | MT-RNR2-like 2                                                | 2.56095  |
| NFAT5     | nuclear factor of activated T-cells 5, tonicity-responsive    | 2.56404  |
| MON2      | MON2 homolog, regulator of endosome-to-Golgi trafficking      | 2.58157  |
| CAPRN2    | caprin family member 2                                        | 2.59071  |
| REV3L     | REV3-like, polymerase (DNA directed), zeta, catalytic subunit | 2.6038   |
| VPS13D    | vacuolar protein sorting 13 homolog D (S. cerevisiae)         | 2.6132   |
| RGS16     | regulator of G-protein signaling 16                           | 2.69566  |
| MDM2      | MDM2 proto-oncogene, E3 ubiquitin protein ligase              | 2.70157  |
| ASCC3     | activating signal cointegrator 1 complex subunit 3            | 2.75748  |
| MYO18A    | myosin XVIII A                                                | 2.78425  |
| CCNG1     | cyclin G1                                                     | 2.78848  |
| USP37     | ubiquitin specific peptidase 37                               | 2.8107   |
| DCUN1D4   | DCN1, defective in cullin neddylation 1, domain containing 4  | 2.85642  |
| FBXO22    | F-box protein 22                                              | 2.87496  |
| PRKX      | protein kinase, X-linked                                      | 2.88002  |
| CD70      | CD70 molecule                                                 | 2.88148  |
| ABCA5     | ATP-binding cassette, sub-family A (ABC1), member 5           | 2.88428  |
| NIN       | ninein (GSK3B interacting protein)                            | 2.89654  |
| NSF       | N-ethylmaleimide-sensitive factor                             | 2.91992  |
| ACSBG1    | acyl-CoA synthetase bubblegum family member 1                 | 2.95294  |
| CHD6      | chromodomain helicase DNA binding protein 6                   | 2.96857  |

|           |                                                          |         |
|-----------|----------------------------------------------------------|---------|
| SYDE2     | synapse defective 1, Rho GTPase, homolog 2 (C. elegans)  | 2.99254 |
| TNS3      | tensin 3                                                 | 2.99463 |
| TRANK1    | tetratricopeptide repeat and ankyrin repeat containing 1 | 3.00411 |
| TP53INP1  | tumor protein p53 inducible nuclear protein 1            | 3.00882 |
| EPPK1     | epiplakin 1                                              | 3.01097 |
| MED12L    | mediator complex subunit 12-like                         | 3.01097 |
| LATS2     | large tumor suppressor kinase 2                          | 3.02556 |
| ABCA1     | ATP-binding cassette, sub-family A (ABC1), member 1      | 3.02931 |
| SYNE1     | spectrin repeat containing, nuclear envelope 1           | 3.02931 |
| LRMP      | lymphoid-restricted membrane protein                     | 3.03051 |
| XPC       | xeroderma pigmentosum, complementation group C           | 3.0529  |
| CDIP1     | cell death-inducing p53 target 1                         | 3.05832 |
| VWCE      | von Willebrand factor C and EGF domains                  | 3.06392 |
| CUL9      | cullin 9                                                 | 3.07469 |
| MYO1A     | myosin IA                                                | 3.08357 |
| NDRG1     | N-myc downstream regulated 1                             | 3.1014  |
| KITLG     | KIT ligand                                               | 3.10443 |
| HMBOX1    | homeobox containing 1                                    | 3.13136 |
| PRKY      | protein kinase, Y-linked, pseudogene                     | 3.14467 |
| PIK3R3    | phosphoinositide-3-kinase, regulatory subunit 3 (gamma)  | 3.15065 |
| REC8      | REC8 meiotic recombination protein                       | 3.16604 |
| CCR7      | chemokine (C-C motif) receptor 7                         | 3.17081 |
| MAN2B2    | mannosidase, alpha, class 2B, member 2                   | 3.17794 |
| SPATA13   | spermatogenesis associated 13                            | 3.18769 |
| CTSV      | cathepsin V                                              | 3.18824 |
| ANKRD20A  | ankyrin repeat domain 20 family, member A9, pseudogene   | 3.20157 |
| HSPA2     | heat shock 70kDa protein 2                               | 3.20555 |
| C11orf21  | chromosome 11 open reading frame 21                      | 3.20921 |
| MARCKSL1  | MARCKS-like 1                                            | 3.21462 |
| APAF1     | apoptotic peptidase activating factor 1                  | 3.22393 |
| SYTL1     | synaptotagmin-like 1                                     | 3.23369 |
| ZNF850    | zinc finger protein 850                                  | 3.23393 |
| FAM212B   | family with sequence similarity 212, member B            | 3.23914 |
| CENPP     | centromere protein P                                     | 3.25194 |
| TMEM2     | transmembrane protein 2                                  | 3.2569  |
| DGKH      | diacylglycerol kinase, eta                               | 3.25961 |
| PGF       | placental growth factor                                  | 3.26334 |
| AMOTL1    | angiomin like 1                                          | 3.28511 |
| ASTN2     | astrotactin 2                                            | 3.30026 |
| GADD45B   | growth arrest and DNA-damage-inducible, beta             | 3.33799 |
| ACER2     | alkaline ceramidase 2                                    | 3.34056 |
| ZC3H8     | zinc finger CCCH-type containing 8                       | 3.38569 |
| GYS1      | glycogen synthase 1 (muscle)                             | 3.39438 |
| PHLDA3    | pleckstrin homology-like domain, family A, member 3      | 3.41463 |
| TRIM22    | tripartite motif containing 22                           | 3.43605 |
| ZNF337    | zinc finger protein 337                                  | 3.46335 |
| RPL23AP53 | ribosomal protein L23a pseudogene 53                     | 3.47076 |

|           |                                                                                    |         |
|-----------|------------------------------------------------------------------------------------|---------|
| DDB2      | damage-specific DNA binding protein 2, 48kDa                                       | 3.49739 |
| CDKN1A    | cyclin-dependent kinase inhibitor 1A (p21, Cip1)                                   | 3.5055  |
| KIAA0754  | KIAA0754                                                                           | 3.51706 |
| RORA      | RAR-related orphan receptor A                                                      | 3.56588 |
| FDXR      | ferredoxin reductase                                                               | 3.57076 |
| STARD4    | StAR-related lipid transfer (START) domain containing 4                            | 3.57583 |
| PKHD1L1   | polycystic kidney and hepatic disease 1 (autosomal recessive)-like 1               | 3.57856 |
| ISYNA1    | inositol-3-phosphate synthase 1                                                    | 3.5832  |
| MIR612    | microRNA 612                                                                       | 3.5932  |
| SEMA4D    | sema domain, immunoglobulin domain (Ig), transmembrane domain (TM) and short cytop | 3.60445 |
| CYP1B1    | cytochrome P450, family 1, subfamily B, polypeptide 1                              | 3.66908 |
| EZH2      | enhancer of zeste 2 polycomb repressive complex 2 subunit                          | 3.68412 |
| PLK3      | polo-like kinase 3                                                                 | 3.69717 |
| DGKA      | diacylglycerol kinase, alpha 80kDa                                                 | 3.7685  |
| DRAM1     | DNA-damage regulated autophagy modulator 1                                         | 3.78444 |
| LINC01021 | long intergenic non-protein coding RNA 1021                                        | 3.78549 |
| ICA1      | islet cell autoantigen 1, 69kDa                                                    | 3.78798 |
| CA3       | carbonic anhydrase III                                                             | 3.80712 |
| CDC42EP3  | CDC42 effector protein (Rho GTPase binding) 3                                      | 3.85706 |
| PAK6      | p21 protein (Cdc42/Rac)-activated kinase 6                                         | 3.85706 |
| RFX7      | regulatory factor X, 7                                                             | 3.88098 |
| ITGAM     | integrin, alpha M (complement component 3 receptor 3 subunit)                      | 3.92075 |
| TRIM5     | tripartite motif containing 5                                                      | 3.92075 |
| FAT1      | FAT atypical cadherin 1                                                            | 3.96717 |
| APOBEC3H  | apolipoprotein B mRNA editing enzyme, catalytic polypeptide-like 3H                | 4.01823 |
| TTYH3     | tweety family member 3                                                             | 4.04147 |
| NOTCH1    | notch 1                                                                            | 4.07187 |
| ZNF81     | zinc finger protein 81                                                             | 4.10434 |
| ANKRD18B  | ankyrin repeat domain 18B                                                          | 4.12802 |
| ANKRD18A  | ankyrin repeat domain 18A                                                          | 4.14161 |
| NYNRIN    | NYN domain and retroviral integrase containing                                     | 4.24822 |
| EDA2R     | ectodysplasin A2 receptor                                                          | 4.37132 |
| LRP1      | low density lipoprotein receptor-related protein 1                                 | 4.41101 |
| APOC1     | apolipoprotein C-I                                                                 | 4.51489 |
| CARNS1    | carnosine synthase 1                                                               | 4.67829 |

| Log Fold Ch | p-Value  | p-Adj    | Average Lo Cluster | HCD34C-d1 | HCD34C-GI | Gene ID  | Alias        |
|-------------|----------|----------|--------------------|-----------|-----------|----------|--------------|
| -2.05968    | 0.004901 | 0.998465 | 10.0226            | 7.87556   | 10.8514   | 3017     | H2B.1B, H2   |
| -2.03999    | 0.005544 | 0.998465 | 9.3073             | 7.16897   | 10.136    | 8340     | H2B/C, H2E   |
| -2.03465    | 0.005275 | 0.998465 | 10.1661            | 8.067     | 10.9884   | 3007     | H1.3, H1D,   |
| -2.0305     | 0.00534  | 0.998465 | 10.1883            | 8.09708   | 11.0097   | 8331     | H2A/E, H2A   |
| -1.98474    | 0.006652 | 0.998465 | 9.288              | 7.24615   | 10.1038   | 8361     | H4, H4/C, F  |
| -1.96351    | 0.007728 | 0.998465 | 8.6086             | 6.56626   | 9.42609   | 8356     | H3/J, H3FJ   |
| -1.94669    | 0.007358 | 0.998465 | 9.5221             | 7.5543    | 10.327    | 8342     | H2B/E, H2E   |
| -1.94456    | 0.006652 | 0.998465 | 11.859             | 9.93478   | 12.6556   | 3009     | H1, H1.5, H  |
| -1.93955    | 0.007054 | 0.998465 | 10.5201            | 8.58906   | 11.3185   | 85236    | H2B/S, H2B   |
| -1.93702    | 0.00743  | 0.998465 | 9.7873             | 7.84399   | 10.5882   | 8351     | H3/B, H3FB   |
| -1.92975    | 0.009037 | 0.998465 | 8.2892             | 6.28204   | 9.10283   | 8359     | H4FA         |
| -1.92257    | 0.007433 | 0.998465 | 10.564             | 8.66128   | 11.358    | 8347     | H2B.1, H2B   |
| -1.90487    | 0.011115 | 0.998465 | 7.5999             | 5.56429   | 8.42076   | 8294     | H4/M, H4FI   |
| -1.90391    | 0.00857  | 0.998465 | 9.354              | 7.45097   | 10.1495   | 8970     | H2B/R, H2E   |
| -1.89826    | 0.008502 | 0.998465 | 9.6514             | 7.76752   | 10.4435   | 8364     | H4/G, H4FC   |
| -1.89777    | 0.008227 | 0.998465 | 10.1466            | 8.27598   | 10.936    | 8345     | H2B/J, H2B   |
| -1.89555    | 0.00793  | 0.998465 | 11.1362            | 9.28414   | 11.9218   | 8358     | H3/L, H3FL   |
| -1.89388    | 0.00849  | 0.998465 | 9.8538             | 7.98253   | 10.6436   | 8367     | H4/J, H4FJ   |
| -1.86629    | 0.010082 | 0.998465 | 8.9463             | 7.08743   | 9.73567   | 317772   | H2AB         |
| -1.85376    | 0.010534 | 0.998465 | 8.9097             | 7.06934   | 9.69619   | 3018     | H2B.1, H2B   |
| -1.84907    | 0.009714 | 0.998465 | 9.9616             | 8.16395   | 10.7393   | 8343     | H2B/G, H2E   |
| -1.84391    | 0.012498 | 0.998465 | 7.9787             | 6.09204   | 8.77575   | 8365     | H4/H, H4FI   |
| -1.83732    | 0.010608 | 0.998465 | 9.3253             | 7.52805   | 10.1038   | 3012     | H2A.1, H2A   |
| -1.83686    | 0.010799 | 0.998465 | 9.1622             | 7.35965   | 9.94189   | 8346     | H2B/K, H2E   |
| -1.81129    | 0.011503 | 0.998465 | 9.3323             | 7.57582   | 10.1038   | 151176   | C1QTNF15,    |
| -1.80376    | 0.011399 | 0.998465 | 9.7163             | 7.98253   | 10.4833   | 8360     | H4/B, H4FB   |
| -1.79911    | 0.011506 | 0.998465 | 9.7859             | 8.06091   | 10.5513   | 8357     | H3/K, H3F1   |
| -1.78926    | 0.010989 | 0.998465 | 11.5035            | 9.81686   | 12.2606   | 3006     | H1.2, H1C,   |
| -1.78683    | 0.011931 | 0.998465 | 9.8147             | 8.10893   | 10.5766   | 8348     | H2B.2, H2B   |
| -1.78407    | 0.02346  | 0.998465 | 5.9052             | 3.68501   | 6.76812   | 1847     | DUSP, HVH    |
| -1.76737    | 0.016068 | 0.998465 | 7.8951             | 6.12744   | 8.67311   | 128312   | H2BB         |
| -1.74922    | 0.01332  | 0.998465 | 9.9132             | 8.26542   | 10.6642   | 8332     | H2A.I, H2A,  |
| -1.74917    | 0.013297 | 0.998465 | 9.9414             | 8.29426   | 10.6922   | 440689   | -            |
| -1.74257    | 0.01564  | 0.998465 | 8.525              | 6.83962   | 9.28583   | 439996   | IFIT1L, BA1. |
| -1.73515    | 0.016379 | 0.998465 | 8.3649             | 6.68189   | 9.12588   | 8368     | H4.K, H4/K,  |
| -1.73199    | 0.02515  | 0.998465 | 6.3345             | 4.37639   | 7.15616   | 1.01E+08 | MIR3687, F   |
| -1.72398    | 0.026185 | 0.998465 | 6.2592             | 4.29571   | 7.08269   | 29968    | EPIP, NLS2,  |
| -1.72149    | 0.02011  | 0.998465 | 7.4633             | 5.72698   | 8.23826   | 8335     | H2A/M, H2    |
| -1.70138    | 0.02149  | 0.998465 | 7.434              | 5.72698   | 8.20402   | 8330     | H2A/D, H2A   |
| -1.67747    | 0.016265 | 0.998465 | 10.267             | 8.72815   | 10.996    | 8329     | H2A/C, H2A   |
| -1.67608    | 0.016529 | 0.998465 | 10.0554            | 8.51526   | 10.7849   | 8341     | H2B/D, H2E   |
| -1.67573    | 0.035378 | 0.998465 | 4.9214             | 2.30856   | 5.84933   | 1393     | CRF-BP, CRI  |
| -1.67035    | 0.034522 | 0.998465 | 5.633              | 3.55238   | 6.48415   | 5008     | -            |
| -1.65593    | 0.018503 | 0.998465 | 9.3599             | 7.83331   | 10.0875   | 8354     | H3.F, H3/F,  |
| -1.64798    | 0.018292 | 0.998465 | 9.81               | 8.30461   | 10.5324   | 8968     | H3/I, H3FI   |
| -1.63718    | 0.02649  | 0.998465 | 7.3426             | 5.72698   | 8.09615   | 1154     | BACTS2, CI   |

|          |          |          |         |         |         |                     |
|----------|----------|----------|---------|---------|---------|---------------------|
| -1.63011 | 0.021292 | 0.998465 | 8.7661  | 7.25684 | 9.49142 | 85235 H2A/S, H2A    |
| -1.61083 | 0.021084 | 0.998465 | 9.4222  | 7.9598  | 10.136  | 8339 H2B.1A, H2     |
| -1.58645 | 0.021229 | 0.998465 | 10.469  | 9.05668 | 11.1701 | 8352 H3.1, H3/C,    |
| -1.57837 | 0.038401 | 0.998465 | 6.4387  | 4.78385 | 7.20891 | 8835 CIS2, CISH2    |
| -1.56734 | 0.038517 | 0.998465 | 6.5643  | 4.95124 | 7.32496 | 90993 OASIS         |
| -1.56679 | 0.022725 | 0.998465 | 10.2801 | 8.89149 | 10.9758 | 8969 H2A.1B, H2     |
| -1.55826 | 0.031495 | 0.998465 | 7.6221  | 6.15057 | 8.34423 | 57761 C20ORF97,     |
| -1.5501  | 0.023619 | 0.998465 | 10.5241 | 9.16001 | 11.2138 | 8349 GL105, H2E     |
| -1.54209 | 0.025136 | 0.998465 | 9.8144  | 8.45151 | 10.5046 | 8336 H2A.1, H2A     |
| -1.54149 | 0.026071 | 0.998465 | 9.3567  | 7.98575 | 10.0494 | 8334 H2A/L, H2A     |
| -1.53835 | 0.038649 | 0.998465 | 6.9146  | 5.40031 | 7.65145 | 1.01E+08 MIR3648, F |
| -1.53273 | 0.029291 | 0.998465 | 8.5249  | 7.14038 | 9.2231  | 168455 C7ORF74      |
| -1.53038 | 0.048743 | 0.998465 | 4.2596  | 1.09064 | 5.25469 | 26298 ESE3, ESE3I   |
| -1.52889 | 0.02868  | 0.998465 | 8.7833  | 7.41323 | 9.47716 | 8366 H4/I, H4FI     |
| -1.52693 | 0.025056 | 0.998465 | 10.7814 | 9.44945 | 11.463  | 6478 HSI AH2        |
| -1.51171 | 0.045348 | 0.998465 | 6.5321  | 5.00299 | 7.27636 | 2335 CIG, ED-B, F   |
| -1.48344 | 0.038848 | 0.998465 | 7.6468  | 6.28204 | 8.34423 | 653604 -            |
| -1.48292 | 0.037699 | 0.998465 | 7.821   | 6.46843 | 8.51453 | 440 ASNSD, TS1      |
| -1.47874 | 0.030573 | 0.998465 | 9.6879  | 8.40418 | 10.3585 | 56262 AGM5, LRR     |
| -1.45601 | 0.035765 | 0.998465 | 8.7097  | 7.43222 | 9.38084 | 8355 H3/H, H3FH     |
| -1.40122 | 0.041735 | 0.998465 | 8.736   | 7.52805 | 9.38848 | 55502 C-HAIRY1, F   |
| -1.39702 | 0.039539 | 0.998465 | 9.4259  | 8.23869 | 10.071  | 8338 H2A, H2A-C     |
| -1.3817  | 0.037188 | 0.998465 | 12.3089 | 11.1613 | 12.9403 | 9911 HUCEP11        |
| -1.34782 | 0.044933 | 0.998465 | 9.6141  | 8.48828 | 10.241  | 83442 HEL-S-297,    |
| -1.28545 | 0.049839 | 0.998465 | 11.4782 | 10.4379 | 12.0771 | 5292 PIM            |
| -1.27951 | 0.049193 | 0.998465 | 18.094  | 17.0653 | 18.6884 | 3043 CD113T-C,      |
| 1.35668  | 0.048418 | 0.998465 | 8.6076  | 9.24707 | 7.44708 | 1E+08 HN2, MTRN     |
| 1.35842  | 0.046305 | 0.998465 | 8.9605  | 9.59669 | 7.80782 | 10725 NF-AT5, NF    |
| 1.36825  | 0.046948 | 0.998465 | 8.5926  | 9.2363  | 7.41751 | 23041 -             |
| 1.37335  | 0.046079 | 0.998465 | 8.6273  | 9.27233 | 7.44708 | 65981 C1QDC1, EI    |
| 1.38062  | 0.04525  | 0.998465 | 8.6073  | 9.2551  | 7.41751 | 5980 POLZ, REV3     |
| 1.38582  | 0.043384 | 0.998465 | 8.8405  | 9.4874  | 7.65145 | 55187 -             |
| 1.43064  | 0.042557 | 0.998465 | 8.045   | 8.7185  | 6.76812 | 6004 A28-RGS14      |
| 1.4338   | 0.033081 | 0.998465 | 10.7742 | 11.4259 | 9.55732 | 4193 ACTFS, HDN     |
| 1.46335  | 0.033522 | 0.998465 | 9.1731  | 9.84283 | 7.89624 | 10973 ASC1P200,     |
| 1.47729  | 0.044477 | 0.998465 | 7.124   | 7.83688 | 5.70989 | 399687 MYSPDZ, SI   |
| 1.47948  | 0.032051 | 0.998465 | 9.1507  | 9.82587 | 7.85271 | 900 CCNG            |
| 1.49093  | 0.04442  | 0.998465 | 6.9552  | 7.67883 | 5.50017 | 57695 -             |
| 1.51421  | 0.039691 | 0.998465 | 7.1728  | 7.89623 | 5.70989 | 23142 -             |
| 1.52354  | 0.039729 | 0.998465 | 7.0478  | 7.77869 | 5.55553 | 26263 FBX22, FIST   |
| 1.52608  | 0.042353 | 0.998465 | 6.7293  | 7.47407 | 5.18619 | 5613 PKX1           |
| 1.52681  | 0.048039 | 0.998465 | 6.1452  | 6.92257 | 4.4754  | 970 CD27L, CD2      |
| 1.52821  | 0.045365 | 0.998465 | 6.3952  | 7.1576  | 4.7843  | 23461 ABC13, EST    |
| 1.53433  | 0.037639 | 0.998465 | 7.1554  | 7.88593 | 5.66025 | 51199 SCKL7         |
| 1.54593  | 0.042245 | 0.998465 | 6.494   | 7.25684 | 4.87414 | 4905 SKD2           |
| 1.56215  | 0.042289 | 0.998465 | 6.2831  | 7.06326 | 4.58588 | 23205 BG, BG1, B    |
| 1.56977  | 0.034008 | 0.998465 | 7.1579  | 7.89965 | 5.60884 | 84181 CHD-6, CHD    |

|         |          |          |         |         |         |                    |
|---------|----------|----------|---------|---------|---------|--------------------|
| 1.58137 | 0.044929 | 0.998465 | 4.6044  | 5.58141 | 1.4701  | 84144 -            |
| 1.58238 | 0.046359 | 0.998465 | 5.4016  | 6.26094 | 3.30042 | 64759 TEM6, TEN:   |
| 1.58694 | 0.023187 | 0.998465 | 9.2228  | 9.93145 | 7.78484 | 9881 LBA1          |
| 1.5892  | 0.021306 | 0.998465 | 10.2802 | 10.9832 | 8.86061 | 94241 SIP, TP53DI  |
| 1.59023 | 0.043808 | 0.998465 | 4.6211  | 5.59833 | 1.4701  | 83481 EPIPL, EPIPI |
| 1.59023 | 0.043808 | 0.998465 | 4.6211  | 5.59833 | 1.4701  | 116931 NOPAR, TN   |
| 1.5972  | 0.044904 | 0.998465 | 5.2585  | 6.13905 | 3.01465 | 26524 KPM          |
| 1.59899 | 0.042724 | 0.998465 | 4.6376  | 5.61505 | 1.4701  | 19 ABC-1, ABC      |
| 1.59899 | 0.042724 | 0.998465 | 4.6376  | 5.61505 | 1.4701  | 23345 8B, ARCA1,   |
| 1.59956 | 0.044817 | 0.998465 | 5.0756  | 5.98031 | 2.65792 | 4033 JAW1          |
| 1.61018 | 0.023169 | 0.998465 | 8.6298  | 9.3518  | 7.13814 | 7508 RAD4, XP3,    |
| 1.61274 | 0.03825  | 0.998465 | 6.0789  | 6.88859 | 4.22528 | 29965 C16ORF5, C   |
| 1.61538 | 0.039549 | 0.998465 | 5.8629  | 6.68981 | 3.92251 | 220001 URG11, VM   |
| 1.62044 | 0.031438 | 0.998465 | 6.8613  | 7.6303  | 5.18619 | 23113 H7AP1, PAF   |
| 1.6246  | 0.039678 | 0.998465 | 4.6858  | 5.66409 | 1.4701  | 4640 BBMI, DFN,    |
| 1.63292 | 0.038727 | 0.998465 | 4.7016  | 5.68007 | 1.4701  | 10397 CAP43, CM    |
| 1.63433 | 0.040367 | 0.998465 | 5.1348  | 6.04345 | 2.65792 | 4254 FPH2, FPHF    |
| 1.64679 | 0.035815 | 0.998465 | 5.9111  | 6.74403 | 3.92251 | 79618 HNF1LA, HC   |
| 1.65291 | 0.031127 | 0.998465 | 6.4973  | 7.29367 | 4.6885  | 5616 PRKXP3, PR    |
| 1.65565 | 0.033365 | 0.998465 | 6.1437  | 6.96232 | 4.22528 | 8503 P55, P55-G.   |
| 1.66268 | 0.028663 | 0.998465 | 6.7316  | 7.51919 | 4.9587  | 9985 HR21SPB, R    |
| 1.66485 | 0.035252 | 0.998465 | 4.7629  | 5.74228 | 1.4701  | 1236 BLR2, CC-CI   |
| 1.66809 | 0.035582 | 0.998465 | 5.5394  | 6.41213 | 3.30042 | 23324 -            |
| 1.67251 | 0.03299  | 0.998465 | 5.9512  | 6.78894 | 3.92251 | 221178 ARHGEF29,   |
| 1.67276 | 0.034433 | 0.998465 | 4.7778  | 5.75743 | 1.4701  | 1515 CATL2, CTS    |
| 1.67878 | 0.0344   | 0.998465 | 5.5568  | 6.43114 | 3.30042 | 284232 -           |
| 1.68057 | 0.03364  | 0.998465 | 4.7926  | 5.77241 | 1.4701  | 3306 HSP70-2, H    |
| 1.68222 | 0.029388 | 0.998465 | 6.3737  | 7.18586 | 4.4754  | 29125 -            |
| 1.68465 | 0.033118 | 0.998465 | 5.7136  | 6.57484 | 3.53884 | 65108 F52, MACM    |
| 1.68882 | 0.033946 | 0.998465 | 5.0248  | 5.96735 | 2.18295 | 317 APAF-1, CEI    |
| 1.69318 | 0.033677 | 0.998465 | 5.2356  | 6.15057 | 2.65792 | 84958 JFC1, SLP1   |
| 1.69329 | 0.030849 | 0.998465 | 5.9838  | 6.82532 | 3.92251 | 342892 ZNF850P     |
| 1.69561 | 0.033245 | 0.998465 | 5.0372  | 5.98031 | 2.18295 | 55924 C1ORF183     |
| 1.7013  | 0.02297  | 0.998465 | 7.1989  | 7.97931 | 5.44261 | 401541 CENP-P      |
| 1.7035  | 0.023981 | 0.998465 | 6.9823  | 7.77125 | 5.18619 | 23670 -, CEMIP2    |
| 1.7047  | 0.025814 | 0.998465 | 6.6517  | 7.45562 | 4.7843  | 160851 DGKETA      |
| 1.70635 | 0.020559 | 0.998465 | 7.6426  | 8.41138 | 5.93532 | 5228 D12S1900,     |
| 1.71594 | 0.031216 | 0.998465 | 5.074   | 6.01852 | 2.18295 | 154810 JEAP        |
| 1.72258 | 0.030577 | 0.998465 | 5.086   | 6.03104 | 2.18295 | 23245 BA67K19.1    |
| 1.73898 | 0.028174 | 0.998465 | 4.9057  | 5.887   | 1.4701  | 4616 GADD45BE      |
| 1.74009 | 0.027675 | 0.998465 | 5.8039  | 6.67393 | 3.53884 | 340485 ALKCDASE2   |
| 1.75945 | 0.024815 | 0.998465 | 6.0893  | 6.94258 | 3.92251 | 84524 FLIZ1, ZC3H  |
| 1.76315 | 0.024511 | 0.998465 | 6.0952  | 6.94919 | 3.92251 | 2997 GSY, GYS      |
| 1.77173 | 0.022283 | 0.998465 | 6.4214  | 7.25684 | 4.35576 | 23612 TIH1         |
| 1.78075 | 0.025467 | 0.998465 | 5.3893  | 6.31312 | 2.65792 | 10346 GPSTAF50,    |
| 1.79217 | 0.021247 | 0.998465 | 6.3575  | 7.20255 | 4.22528 | 26152 -            |
| 1.79525 | 0.021026 | 0.998465 | 6.3625  | 7.20808 | 4.22528 | 644128 RPL23A_20   |

|         |          |          |        |         |         |                   |
|---------|----------|----------|--------|---------|---------|-------------------|
| 1.80628 | 0.012289 | 0.998465 | 8.9264 | 9.70121 | 7.15616 | 1643 DDBB, UV-I   |
| 1.80962 | 0.011495 | 0.998465 | 9.4554 | 10.2263 | 7.7014  | 1026 CAP20, CDK   |
| 1.81437 | 0.022811 | 0.998465 | 5.2556 | 6.20681 | 2.18295 | 643314 -          |
| 1.83426 | 0.014368 | 0.998465 | 7.499  | 8.30718 | 5.55553 | 6095 NR1F1, ROF   |
| 1.83623 | 0.011387 | 0.998465 | 8.7901 | 9.57442 | 6.96496 | 2232 ADXR         |
| 1.83828 | 0.014823 | 0.998465 | 7.3025 | 8.11776 | 5.32009 | 134429 -          |
| 1.83938 | 0.018924 | 0.998465 | 6.2207 | 7.08743 | 3.92251 | 93035 PKHDL1      |
| 1.84125 | 0.020397 | 0.998465 | 5.1082 | 6.09204 | 1.4701  | 51477 INO1, INOS  |
| 1.84527 | 0.01771  | 0.998465 | 6.4443 | 7.29885 | 4.22528 | 693197 MIRN612, F |
| 1.84978 | 0.019983 | 0.998465 | 5.688  | 6.60026 | 3.01465 | 10507 C9ORF164,   |
| 1.87542 | 0.012118 | 0.998465 | 7.6993 | 8.51303 | 5.70989 | 1545 CP1B, CYPII  |
| 1.88132 | 0.009869 | 0.998465 | 8.8007 | 9.59669 | 6.90228 | 2146 ENX-1, ENX   |
| 1.88642 | 0.01607  | 0.998465 | 6.3004 | 7.17462 | 3.92251 | 1263 CNK, FNK, F  |
| 1.91399 | 0.014239 | 0.998465 | 6.4577 | 7.32957 | 4.08182 | 1606 DAGK, DAG    |
| 1.92008 | 0.013325 | 0.998465 | 6.6657 | 7.52805 | 4.35576 | 55332 DRAM        |
| 1.92048 | 0.010273 | 0.998465 | 7.8144 | 8.63693 | 5.75788 | 643401 -          |
| 1.92143 | 0.015864 | 0.998465 | 5.6468 | 6.58336 | 2.65792 | 3382 ICA69, ICAF  |
| 1.9287  | 0.015215 | 0.998465 | 5.8308 | 6.75161 | 3.01465 | 761 CAIII, CAR3   |
| 1.9475  | 0.014332 | 0.998465 | 5.327  | 6.31312 | 1.4701  | 10602 BORG2, CEI  |
| 1.9475  | 0.014332 | 0.998465 | 5.327  | 6.31312 | 1.4701  | 56924 PAK5        |
| 1.95642 | 0.008562 | 0.998465 | 8.1732 | 8.99733 | 6.0933  | 64864 RFXDC2      |
| 1.97113 | 0.012489 | 0.998465 | 6.2028 | 7.1053  | 3.53884 | 3684 CD11B, CR3   |
| 1.97113 | 0.008529 | 0.998465 | 7.9394 | 8.77168 | 5.80433 | 85363 RNF88, TRII |
| 1.98811 | 0.010019 | 0.998465 | 6.9565 | 7.82255 | 4.58588 | 2195 CDHF7, CDI   |
| 2.00656 | 0.011689 | 0.998465 | 5.4533 | 6.44055 | 1.4701  | 164668 A3H, ARP-1 |
| 2.01488 | 0.011353 | 0.998465 | 5.4718 | 6.4592  | 1.4701  | 80727 -           |
| 2.02569 | 0.011058 | 0.998465 | 5.6699 | 6.63347 | 2.18295 | 4851 AOS5, AOV    |
| 2.03715 | 0.009111 | 0.998465 | 6.6766 | 7.56725 | 4.08182 | 347344 HFZ20, MR  |
| 2.04545 | 0.006595 | 0.998465 | 8.0262 | 8.87422 | 5.75788 | 441459 BA255A11.  |
| 2.05019 | 0.009352 | 0.998465 | 6.3499 | 7.26216 | 3.53884 | 253650 -          |
| 2.08686 | 0.007568 | 0.998465 | 6.7692 | 7.66685 | 4.08182 | 57523 CGIN1, KIA  |
| 2.12807 | 0.005508 | 0.998465 | 7.567  | 8.44451 | 5.03858 | 60401 EDA-A2R, E  |
| 2.14111 | 0.006982 | 0.998465 | 6.2449 | 7.18586 | 3.01465 | 4035 A2MR, APC    |
| 2.17469 | 0.006366 | 0.998465 | 5.9914 | 6.96232 | 2.18295 | 341 APO-CI, API   |
| 2.22598 | 0.004434 | 0.998465 | 7.0438 | 7.9598  | 4.08182 | 57571 ATPGD1      |

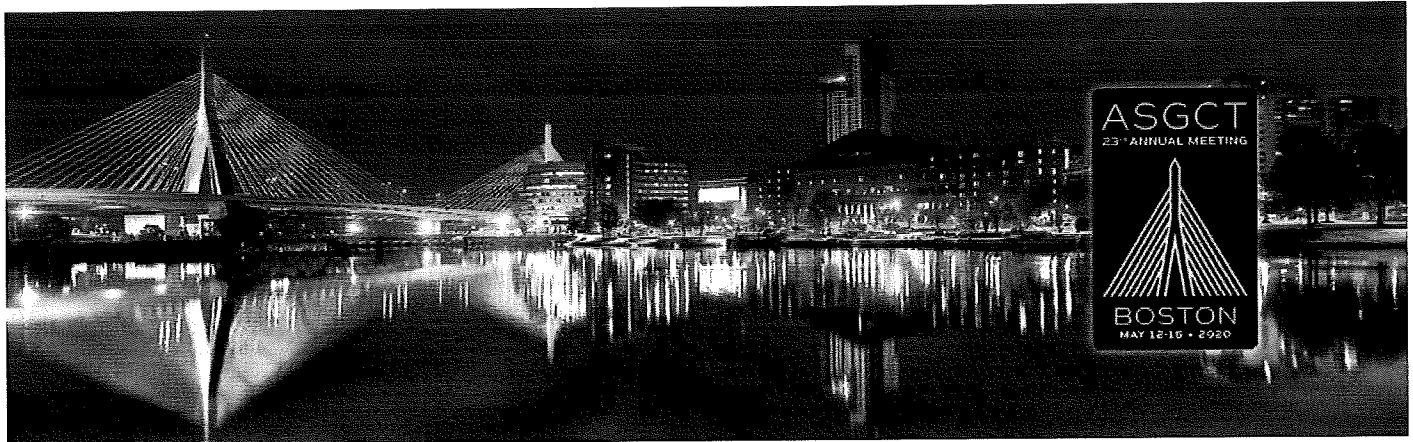

[Print this Page for Your Records](#)

[Close Window](#)

**Control/Tracking Number:** 2020-A-1700-ASGCT

**Activity:** Abstract

**Current Date/Time:** 1/30/2020 11:53:38 AM

***In vivo* HSC gene therapy for hemoglobinopathies: a proof of concept evaluation in rhesus macaques**

**Author Block:** Chang Li<sup>1</sup>, Hongjie Wang<sup>1</sup>, Audrey Germond<sup>2</sup>, Alan Ung<sup>2</sup>, Kate Guerriero<sup>2</sup>, Jason Ogle<sup>2</sup>, Veronica Nelson<sup>3</sup>, Dean Jeffrey<sup>2</sup>, Cari Coles<sup>4</sup>, Aphrodite Georgakopoulou<sup>1</sup>, Evangelia Yannaki<sup>5</sup>, Thalia Papayannopoulou<sup>1</sup>, Zsuzsanna Izsvak<sup>6</sup>, Hans-Peter Kiem<sup>3</sup>, Andre Lieber<sup>7</sup>

<sup>1</sup>Medicine, University of Washington, Seattle, WA,<sup>2</sup>WaNPCRC, University of Washington, Seattle, WA,<sup>3</sup>FHCRC, Seattle, WA,<sup>4</sup>University of Washington, University of Washington, Seattle, WA,<sup>5</sup>Cell and Gene Therapy Center, Thessaloniki, Greece,<sup>6</sup>MDC, Berlin, Germany,<sup>7</sup>Medicine, University of Washington, SEATTLE, WA

**Abstract:**

Current gene therapy or genome editing studies for hemoglobinopathies require highly sophisticated medical facilities to perform hematopoietic stem cell (HSC) collections/selections and genetic modifications. In addition, patients receive high-dose chemotherapy to facilitate engraftment of gene-modified cells. Thus, current gene therapy protocols will not be accessible to most patients suffering from hemoglobinopathies. Here we describe a highly portable and scalable approach using *in vivo* HSC gene therapy to potentially overcome these limitations. The central idea of our *in vivo* HSC gene therapy approach is to mobilize HSCs from the bone marrow, and while they circulate at high numbers in the periphery, transduce them with an intravenously injected HSC-tropic, helper-dependent adenovirus HDAd5/35++ gene transfer vector system. Transduced cells return to the bone marrow where they persist long-term. Transgene integration is either achieved by a *Sleeping Beauty* transposase (SB100x) in a random pattern or by homology-directed-repair into a safe genomic harbor site. Currently, an *in vivo* selection system (involving the  $\text{mgmt}^{\text{P140K}}$  gene/low-dose  $\text{O}^6\text{BG/BCNU}$ ) is employed to achieve 80-100% marking levels in peripheral blood cells. We demonstrated safety and efficacy of our approach in mouse models for thalassemia intermedia and hemophilia A, where we achieved a phenotypic correction. We now present data in rhesus macaques. The first animal was followed for 22 weeks after *in vivo* HSC transduction with a human- $\gamma$ -globin expressing HDAd5/35++ vector using SB100x for integration. Treatment with G-CSF/AMD3100 resulted in efficient HSC mobilization. Intravenous injection of the HDAd5/35++ vector system (total  $1.5 \times 10^{12}$  vp/kg, in two doses) into mobilized animals was well tolerated after pretreatment with steroids and the IL-6 receptor inhibitor, tocilizumab. After *in vivo* selection, gamma-globin marking in peripheral red blood cells rose to ~90% and was stable during the study duration (see Figure). Gamma-globin levels in red blood cells were ~18% of adult alpha1-globin (by HPLC). There were no histological abnormalities at necropsy (week 22). A second mobilized animal was injected with an HDAd5/35++ vector system that allowed for targeted integration into the AAVS1 locus (total  $3.2 \times 10^{12}$  vp/kg in two doses). This animal was pre-treated with the IL-1beta receptor antagonist Anakinra, in addition to steroids and tocilizumab. Despite the relatively high vector dose, no side effects of the intravenous HDAd5/35++ injection were observed. A third animal will be started in February. Our data suggest that acute responses to the vector injection can be prevented with appropriate pretreatment. This is the first proof-of-concept study that *in vivo* HSC gene therapy could be feasible in humans and provide the necessary portability and accessibility to reach patients in places with limited medical resources. Ongoing studies involve the optimization of HSC mobilization, gene transfer vectors, and *in vivo* selection.



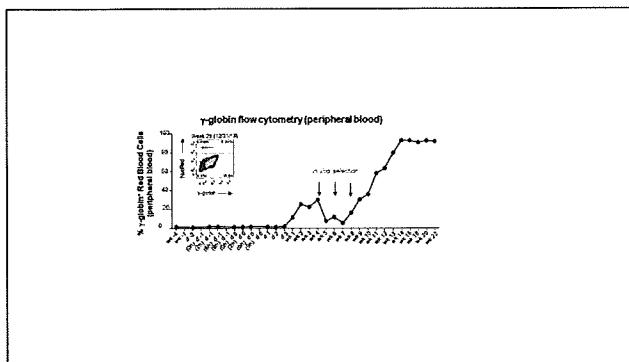

Author Disclosure Information:

C. Li: None.

**Presenter Information (Complete):**

**Membership Status:** Associate Member

**Gender:** Male

**United States Citizenship status:** Not a US Citizen

**If you consider yourself a member of one of the following U.S. under-represented groups, please indicate which one below:** N/A

**Category (Complete):** Hematologic & Immunologic Diseases ; Gene Targeting & Gene Correction (basic development of novel technologies for genome editing, with/without site-specific endonuclease)\*

**Presentation Preference (Complete):** Either Oral or Poster

**Questionnaire (Complete):**

**Clinical Trial/Clinical Study:** NO, this abstract is NOT a Clinical Trial/Clinical Study

**Prior Publication:** No, my abstract has NOT been previously published

**I confirm that all authors on this abstract approve this submission. :** True

**Social Media Consideration:** Yes

**Disease Focus of Abstract:** Hemoglobinopathies

**National Heart, Lung and Blood Institute (NHLBI) :** True

**Other Foundation Funding :** Bill and Melinda Gates Foundation

**Awards (Complete):**

**Trainee Travel Award Consideration:** I am applying as a postdoctoral fellow

**Underrepresented Minority Travel Award Consideration:** I am not applying

**Under-Represented Minority group:** N/A

**Keywords (Complete):** Hematologic Diseases ; Hematopoietic Stem Cells ; Animal Models

**Status:** Complete

To become a member of the American Society of Gene & Cell Therapy go to <http://www.asgct.org/membership/join-asgct>.

Questions about the **ASGCT Annual Meeting**? Contact ASGCT at [info@asgct.org](mailto:info@asgct.org).

Questions? Contact cOASIS Support at [asgct@support.ctimeetingtech.com](mailto:asgct@support.ctimeetingtech.com).

📍 Feedback

Powered by cOASIS, The Online Abstract Submission and Invitation System <sup>SM</sup>

© 1996 - 2020 [CTI Meeting Technology](#). All rights reserved. [Privacy Policy](#).
